# Supplementary material for: Psychometric Properties and Cultural Adaptation of the Polish Version of the Healthy Lifestyle and Personal Control Questionnaire (HLPCQ)
Source: MDPI journal article supplement (doi:10.3390/ijerph18179190), 2021-08-31
Supplement: s1 [file s1]

Supplementary Material  
Table S1. The Polish version of the Healthy Lifestyle and Personal Control Questionnaire

### Kwestionariusz Zdrowego Stylu Życia i Samokontroli

Poniżej znajdziesz zestaw codziennych zachowań i nawyków.

Wskaż, jak często obserwujesz u siebie te zachowania na podstawie następującej skali:

1 = rzadko lub nigdy, 2 = czasami, 3 = często, 4 = zawsze

|                                                                                                                           |   |   |   |   |
|---------------------------------------------------------------------------------------------------------------------------|---|---|---|---|
| 1. Zwracam uwagę na ilość jedzenia na moim talerzu                                                                        | 1 | 2 | 3 | 4 |
| 2. Staram się jeść codziennie o tej samej porze                                                                           | 1 | 2 | 3 | 4 |
| 3. Sprawdzam etykiety produktów, które kupuję                                                                             | 1 | 2 | 3 | 4 |
| 4. Liczę kalorie w posiłkach                                                                                              | 1 | 2 | 3 | 4 |
| 5. Ograniczam tłuszcze w posiłkach                                                                                        | 1 | 2 | 3 | 4 |
| 6. Dbam, aby nie opuścić żadnego posiłku w ciągu dnia                                                                     | 1 | 2 | 3 | 4 |
| 7. Dbam o to, żeby jeść dobre śniadanie                                                                                   | 1 | 2 | 3 | 4 |
| 8. Unikam gotowych posiłków / posiłków typu 'fast food'                                                                   | 1 | 2 | 3 | 4 |
| 9. Unikam słodzonych napojów                                                                                              | 1 | 2 | 3 | 4 |
| 10. Kiedy jestem zestresowany/-a lub zdenerwowany/-a, unikam jedzenia dla ulgi                                            | 1 | 2 | 3 | 4 |
| 11. Unikam jedzenia w dużej ilości, kiedy jestem z przyjaciółmi lub kiedy wychodzę                                        | 1 | 2 | 3 | 4 |
| 12. Chodzę spać codziennie o tej samej porze                                                                              | 1 | 2 | 3 | 4 |
| 13. Lubię gotować                                                                                                         | 1 | 2 | 3 | 4 |
| 14. Jem produkty pochodzenia organicznego (ekologiczne)                                                                   | 1 | 2 | 3 | 4 |
| 15. Jem śniadanie codziennie o tej samej porze                                                                            | 1 | 2 | 3 | 4 |
| 16. Jem produkty pełnoziarniste                                                                                           | 1 | 2 | 3 | 4 |
| 17. Jem obiad codziennie o tej samej porze                                                                                | 1 | 2 | 3 | 4 |
| 18. Dzielę się swoimi problemami i troskami z innymi                                                                      | 1 | 2 | 3 | 4 |
| 19. Jem kolację codziennie o tej samej porze                                                                              | 1 | 2 | 3 | 4 |
| 20. Wykonuję ćwiczenia aerobowe (np. chodzenie, jazda na rowerze) przez 20 minut lub więcej co najmniej 3 razy w tygodniu |   |   |   |   |
| 21. W trudnych chwilach dbam o to, żeby skupiać się na pozytywnych myślach                                                | 1 | 2 | 3 | 4 |
| 22. Moje codzienne aktywności przebiegają według określonego harmonogramu                                                 | 1 | 2 | 3 | 4 |
| 23. Mam ustalony program ćwiczeń/treningów, zgodnie z którym ćwiczę                                                       | 1 | 2 | 3 | 4 |
| 24. Kiedy zasypiam oczyszczam umysł z myśli i nie zastanawiam się nad planem na jutrzejszy dzień.                         | 1 | 2 | 3 | 4 |
| 25. Dbam o częste spotkania i rozmowy z osobami z mojego środowiska rodzinnego                                            | 1 | 2 | 3 | 4 |
| 26. Zachowuję równowagę między pracą, czasem wolnym i życiem osobistym                                                    | 1 | 2 | 3 | 4 |
| <b><u>Instrukcja dotyczące punktacji</u></b>                                                                              |   |   |   |   |
| <b>Podskale</b>                                                                                                           |   |   |   |   |
| <b>A. Zdrowe wybory żywieniowe (Healthy dietary choices)</b>                                                              |   |   |   |   |
| 1+3+4+5+13+14+16                                                                                                          |   |   |   |   |

|                                                                                                                                                                                                                                                                                                                                                                                                                                       |  |  |  |  |
|---------------------------------------------------------------------------------------------------------------------------------------------------------------------------------------------------------------------------------------------------------------------------------------------------------------------------------------------------------------------------------------------------------------------------------------|--|--|--|--|
| <p><b>B. Dietetyczne unikanie szkód (Dietary harm avoidance)</b><br/>8+9+10+11</p> <p><b>C. Codzienna rutyna (Daily routine)</b><br/>2+6+7+12+15+17+19+22</p> <p><b>D. Zorganizowane ćwiczenia fizyczne (Organized physical exercise)</b><br/>20+23</p> <p><b>E. Wsparcie społeczne i zdrowie psychiczne (Social and mental balance)</b><br/>18+21+24+25+26</p> <p><b>Ogólna ocena= A+B+C+D+E</b></p>                                 |  |  |  |  |
| <p>Czapla, M.; Juárez-Vela, R.; Rozensztrauch, A.; Karniej, P.; Uchmanowicz, I.; Santolalla-Arnedo, I.; Baska, A. Psychometric Properties and Cultural Adaptation of the Polish Version of the Healthy Lifestyle and Personal Control Questionnaire (HLPCQ). <i>Int. J. Environ. Res. Public Health</i> <b>2021</b>, <i>18</i>, 9190. <a href="https://doi.org/10.3390/ijerph18179190">https://doi.org/10.3390/ijerph18179190</a></p> |  |  |  |  |
